# Supplementary material
Source: PubMed Central journal article supplement (PMC3109494)
Supplement: NIHMS278866-supplement-1_si_001.pdf [file NIHMS278866-supplement-1_si_001.pdf]

## **Supporting Information**

for

### **The aggregation-enhancing Huntingtin N-terminus is helical in amyloid fibrils.**

V.N. Sivanandam<sup>1</sup>, Murali Jayaraman<sup>1,2</sup>, Cody L. Hoop<sup>1</sup>, Ravindra Kodali<sup>1,2</sup>, Ronald Wetzel<sup>1,2</sup>, and Patrick C.A. van der Wel<sup>1</sup>

<sup>1</sup>Department of Structural Biology, and <sup>2</sup> Pittsburgh Institute for Neurodegenerative Diseases, University of Pittsburgh School of Medicine, Pittsburgh, PA

**Table S1 – <sup>13</sup>C chemical shift resonances<sup>a</sup>.**

| <b>htt<sup>NT</sup>Q<sub>30</sub>P<sub>10</sub>K<sub>2</sub> fibrils</b> |                             |                              |                              |                                |                              |                               |                  |
|--------------------------------------------------------------------------|-----------------------------|------------------------------|------------------------------|--------------------------------|------------------------------|-------------------------------|------------------|
| <b>Res.</b>                                                              | <b>C<math>\alpha</math></b> | <b>C<math>\beta</math></b>   | <b>C<math>\gamma</math></b>  | <b>C<math>\delta</math>(1)</b> | <b>C<math>\delta</math>2</b> | <b>C<math>\epsilon</math></b> | <b>CO</b>        |
| A2                                                                       | 52.7 $\pm$ 0.26             | 19.1 $\pm$ 0.11              |                              |                                |                              |                               | 178.2 $\pm$ 0.26 |
| L4                                                                       | 57.8 $\pm$ 0.10             | 41.1 $\pm$ 0.21              | 27.1 $\pm$ 0.15              | 27.1 $\pm$ 0.2                 | 24.48 $\pm$ 0.10             |                               | 178.4 $\pm$ 0.3  |
| K6                                                                       | 59.5 $\pm$ 0.10             | 32.6 $\pm$ 0.14              | 25.8 $\pm$ 0.15              | 29.55 $\pm$ 0.10               |                              | 42.1 $\pm$ 0.10               | 179.9 $\pm$ 0.10 |
| L7                                                                       | 57.8 $\pm$ 0.19             | 41.9 $\pm$ 0.13              | 26.8 $\pm$ 0.19              | 25.2 $\pm$ 0.11                | 27.2 $\pm$ 0.08              |                               | 178.3 $\pm$ 0.14 |
| A10                                                                      | 55.0 $\pm$ 0.19             | 18.1 $\pm$ 0.15              |                              |                                |                              |                               | 180.0 $\pm$ 0.29 |
| F11 <sup>b</sup>                                                         | 61.2 $\pm$ 0.3              | 39.3 $\pm$ 0.3               | 131.4 $\pm$ 0.3              |                                |                              |                               | b)               |
| L14                                                                      | 55.7 $\pm$ 0.36             | 42.1 $\pm$ 0.16              | 26.6 $\pm$ 0.33              | 26.6 $\pm$ 0.33                | 23.3 $\pm$ 0.24              |                               | 177.0 $\pm$ 0.44 |
| S16                                                                      | 56.8 $\pm$ 0.3              | 65.2 $\pm$ 0.3               |                              |                                |                              |                               | 173 $\pm$ 0.5    |
|                                                                          | 58.9 $\pm$ 0.3              | 62.8 $\pm$ 0.3               |                              |                                |                              |                               | 173 $\pm$ 0.5    |
| F17 <sup>b</sup>                                                         | 57.1 $\pm$ 0.10             | b)                           | 131.7 $\pm$ 0.19             |                                |                              |                               | 175.8 $\pm$ 0.31 |
|                                                                          | 56.6 $\pm$ 0.12             | b)                           | 131.7 $\pm$ 0.19             |                                |                              |                               | 174.3 $\pm$ 0.23 |
| Q18                                                                      | 55.7 $\pm$ 0.27             | 34.2 $\pm$ 0.16              | 34.4 $\pm$ 0.16              | 178.8 $\pm$ 0.18               |                              |                               | 175.6 $\pm$ 0.10 |
|                                                                          | 54.7 $\pm$ 0.13             | 30.85 $\pm$ 0.14             | 30.65 $\pm$ 0.14             | 177.8 $\pm$ 0.16               |                              |                               | 174.2 $\pm$ 0.14 |
| Q19                                                                      | 56.0 $\pm$ 0.16             | 34.2 $\pm$ 0.15              | 34.15 $\pm$ 0.06             | 178.6 $\pm$ 0.10               |                              |                               | 176.0 $\pm$ 0.16 |
|                                                                          | 53.9 $\pm$ 0.10             | 31.1 $\pm$ 0.42 <sup>c</sup> | 30.6 $\pm$ 0.34 <sup>c</sup> | 177.6 $\pm$ 0.10               |                              |                               | 174.2 $\pm$ 0.10 |
| Pro <sup>d</sup>                                                         | 61.2 $\pm$ 0.2              | 31.9 $\pm$ 0.2               | 27.3 $\pm$ 0.2               | 50.3 $\pm$ 0.2                 |                              |                               |                  |
| <b>K<sub>2</sub>Q<sub>30</sub>K<sub>2</sub> fibrils</b>                  |                             |                              |                              |                                |                              |                               |                  |
| <b>Res.</b>                                                              | <b>C<math>\alpha</math></b> | <b>C<math>\beta</math></b>   | <b>C<math>\gamma</math></b>  | <b>C<math>\delta</math>(1)</b> | <b>C<math>\delta</math>2</b> | <b>C<math>\epsilon</math></b> | <b>CO</b>        |
| Q6                                                                       | 56.4 $\pm$ 0.2              | 34.6 $\pm$ 0.1               | 33.9 $\pm$ 0.3               | 178.8 $\pm$ 0.1                |                              |                               | 176.0 $\pm$ 0.2  |
|                                                                          | 54.3 $\pm$ 0.1              | 31.7 $\pm$ 0.2               | 30.3 $\pm$ 0.1               | 177.8 $\pm$ 0.1                |                              |                               | 174.0 $\pm$ 0.1  |

a) The reported chemical shifts are indirectly referenced relative to aqueous DSS.

b) Some of the Phe resonances could not be identified due to overlap and/or low intensities. Listed C $\gamma$  resonances reflect the maximum of a broad peak from the combined aromatic resonances (see **Figure S3**).

c) These Q19 peaks sometimes appear as split into two closely spaced cross-peaks.

d) Tentatively assigned resonances of unlabeled Pro. These identifications are based on similarity to typical Pro shifts and the relative abundance of the 10 Pro in the primary sequence. These values are thought to reflect the bulk of the Pro, but specific residues could deviate from these shifts. The observed shift pattern corresponds well to that of previously reported polyPro shifts in a PPII conformation, in the solution as well as solid state <sup>1</sup>.

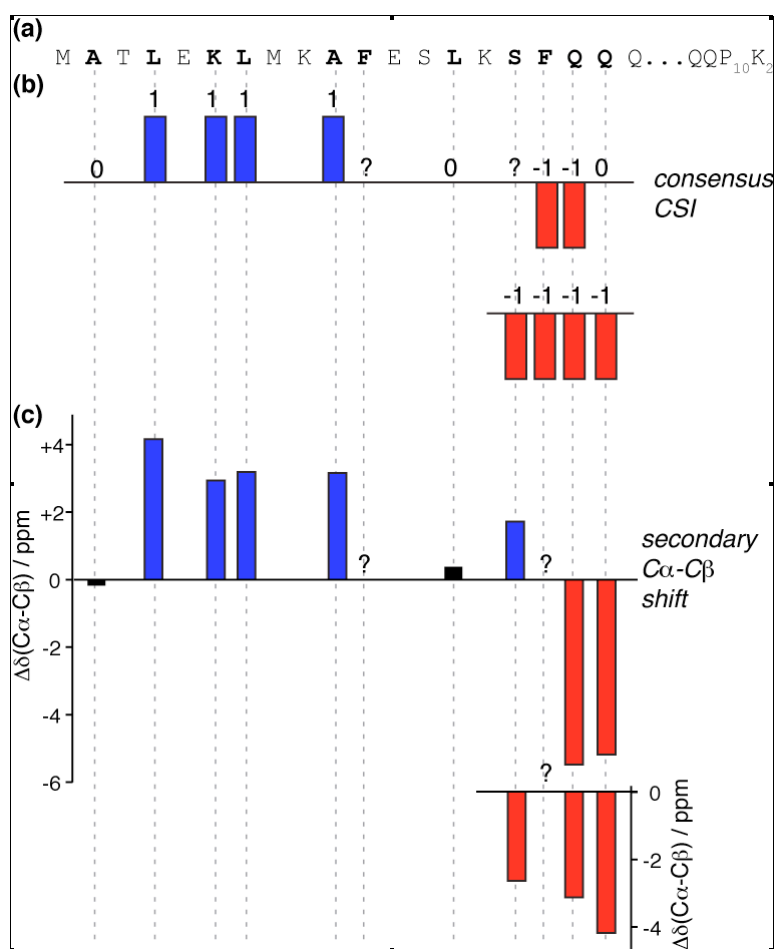

**Figure S1 – Secondary structure.** (a) Sequence of htt<sup>NT</sup>Q<sub>30</sub>P<sub>10</sub>K<sub>2</sub>, with labeled sites marked in bold. (b) Graphical representation of consensus CSI for isolated residues<sup>2</sup>. Values of 1, 0, and -1 indicate  $\alpha$ -helix, undefined secondary structure and  $\beta$ -sheet, respectively (color coded as in Fig. 5). Question marks indicate sites where the consensus CSI approach was ambivalent (in part due to a few unobserved Phe resonances – see table S1). Doubled resonances are shown as two separate rows, where the grouping is arbitrary and does not indicate that the top and bottom rows are expected to be in the same molecule. (c) Alternative approach to secondary structure analysis based on the characteristic shift difference between the C $\alpha$  and C $\beta$  sites. This approach benefits from its lack of sensitivity to referencing errors, and has been proposed as particularly useful for ssNMR<sup>3</sup>. Unobserved Phe C $\beta$  sites prevent analysis of these residues and are marked by question marks. Positive and negative values indicate  $\alpha$ -helical (blue) and  $\beta$ -sheet backbone conformations (red), respectively.

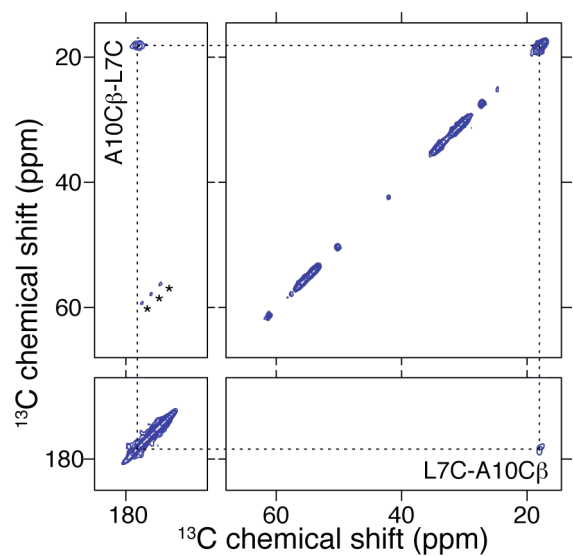

**Figure S2 – Observation of L7-A10 inter-residue contact.** Inter-residue cross-peaks between A10-C $\beta$  and L7-C' are observed in this 400ms PDS experiment on sample p4, indicating an  $i$ -( $i+3$ ) contact. This is consistent with a helical conformation, but not an extended  $\beta$ -sheet. The possibility of inter-molecular interactions contributing to the cross-peak can not be entirely excluded, as the sample was 100% labeled, but seems less likely given the observed significant mobility of the helix.

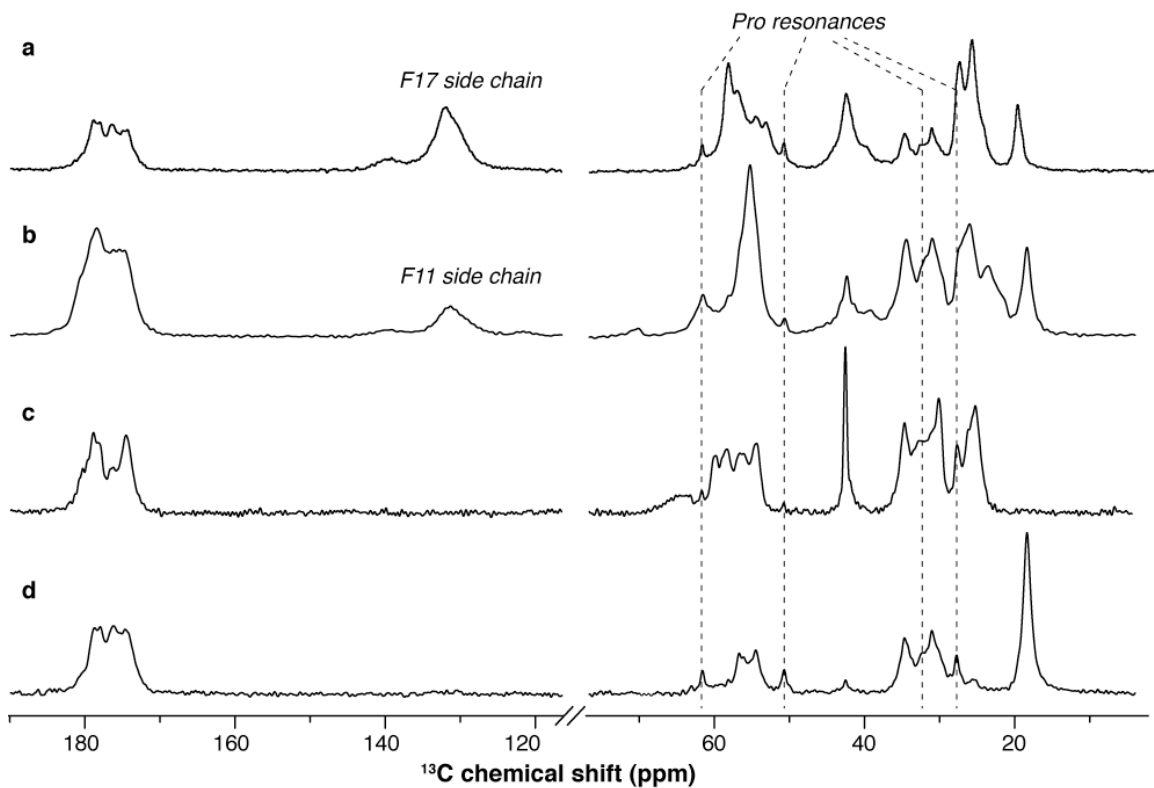

**Figure S3 – 1D  $^{13}\text{C}$  CP spectra of samples p1 (a), p2 (b), p3 (c), and p4 (d).** (a) and (b) include the aromatic signals due to the phenylalanine side chains of F17 and F11. These aromatic signals are severely broadened, a feature that is indicative of motional averaging (e.g. ring flip). The spectra also include background signals due to natural abundance (NA)  $^{13}\text{C}$  signals from unlabeled residues, in particular in spectrum (d) where only three carbons are labeled (sample p4:  $^{13}\text{C}'\text{-L7}$ ,  $^{13}\text{C}\beta\text{-A10}$ ,  $^{13}\text{C}'\text{-F17}$ ). Vertical dashed lines mark the position of NA resonances consistent with Pro sites in a PPII conformation (see also Table S1).

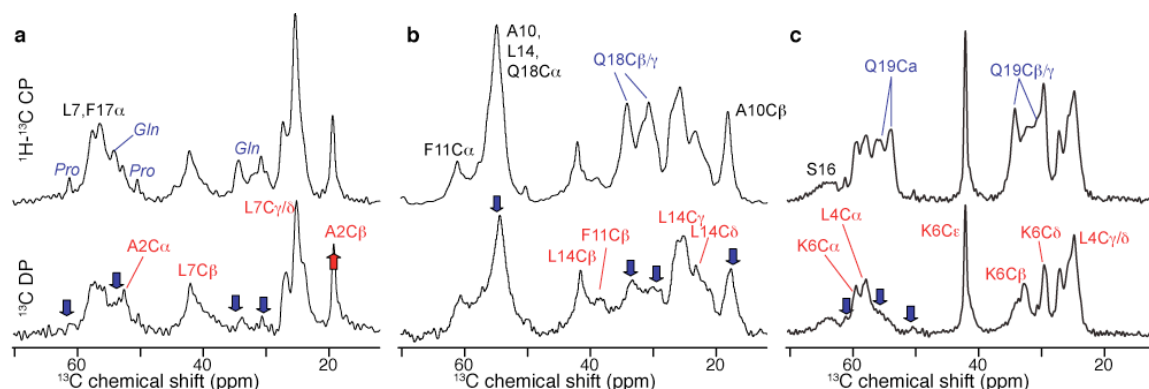

**Figure S4 – Site-specific dynamics via motionally sensitive 1D ssNMR.** The  $^{13}\text{C}$  aliphatic region for the isotopically labeled samples p1 (a), p2 (b) and p3 (c) is shown, from  $^1\text{H}$ - $^{13}\text{C}$  CP spectra (top) and direct excitation  $^{13}\text{C}$  spectra (bottom), the latter using relatively short recycle delays. Peaks that are suppressed in the bottom row have a long  $^{13}\text{C}$   $T_1$  and are most rigid (indicated by blue arrows). Peak assignments are color coded, with the most rigid sites in blue, and the more mobile sites in red. NA residue group assignments are indicated in italics. These site-specific differences in mobility provide a more fine-grained picture consistent with the NA  $^{13}\text{C}$  spectra. The  $\beta$ -sheet Gln sites are again highly rigid. The mobile signals are located within the ht<sup>NT</sup> segment and include residues that are helical or lack a defined secondary structure.

**Table S2 – Sequences, labeling and amounts of isotopically labeled NMR samples.**

| ID  | Labeling                                                               | Sequence <sup>a</sup>                                                                 | Amount (mg) |
|-----|------------------------------------------------------------------------|---------------------------------------------------------------------------------------|-------------|
| p1  | $\text{U-}^{13}\text{C}, ^{15}\text{N}$ -[A2, L7, F17]                 | <u>M</u> <u>A</u> TLEKLMKAFESLKSFQQQ-Q <sub>27</sub> P <sub>10</sub> K <sub>2</sub>   | 2           |
| p2  | $\text{U-}^{13}\text{C}, ^{15}\text{N}$ -[A10, F11, L14, Q18]          | MATLEKLMK <u>A</u> FESL <u>K</u> SFQQQ-Q <sub>27</sub> P <sub>10</sub> K <sub>2</sub> | 3           |
| p3  | $\text{U-}^{13}\text{C}, ^{15}\text{N}$ -[L4, K6, S16, Q19]            | MATLEKLMKAFESLKSFQQQ-Q <sub>27</sub> P <sub>10</sub> K <sub>2</sub>                   | 1.8         |
| p4  | $^{13}\text{C}'$ -L7, $^{13}\text{C}\beta$ -A10, $^{13}\text{C}'$ -F17 | MATLEKLMKAFESLKSFQQQ-Q <sub>27</sub> P <sub>10</sub> K <sub>2</sub>                   | 5.2         |
| n/a | $\text{U-}^{13}\text{C}, ^{15}\text{N}$ -[Q6]                          | KKQQQQQ <sub>26</sub> KK                                                              | 4           |

a) The labeled residues are also shown as underlined in the primary sequence.

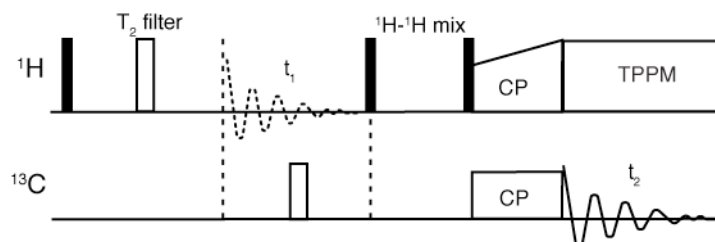

**Figure S5 – Water-filtered HETCOR pulse sequence.** A  $T_2$  filter is used to eliminate rigid protons, followed by a longitudinal  $^1\text{H}$ - $^1\text{H}$  mixing period. The  $t_1$  evolution period is omitted for the 1D spectra (e.g. Figure 7), but allows the unequivocal identification of the source of the proton magnetization in 2D experiments.

**Table S3 – Detailed experimental conditions of 1D and 2D NMR experiments shown in the main text and supporting information.**

| 1D spectra <sup>a</sup> |                                       |                                   |      |           |           |        |                              |                               |                                         |
|-------------------------|---------------------------------------|-----------------------------------|------|-----------|-----------|--------|------------------------------|-------------------------------|-----------------------------------------|
| Figure                  | Sample <sup>b</sup>                   | Experiment                        | NS   | Temp. (K) | MAS (kHz) | RD (s) | TPPM during ACQ. (kHz)       | $T_2$ filter time (ms)        | $^1\text{H}$ - $^1\text{H}$ Mixing (ms) |
| 6                       | p4                                    | $^1\text{H}$ - $^{13}\text{C}$ CP | 1024 | 275       | 10        | 3      | 83                           | n/a                           | n/a                                     |
| 6                       | p5*                                   | $^1\text{H}$ - $^{13}\text{C}$ CP | 2662 | 275       | 10        | 3      | 83                           | n/a                           | n/a                                     |
| 6                       | p5*                                   | $^{13}\text{C}$ 1D                | 2048 | 275       | 12        | 3      | 83                           | n/a                           | n/a                                     |
| 6                       | $\text{K}_2\text{Q}_{31}\text{K}_2^*$ | $^1\text{H}$ - $^{13}\text{C}$ CP | 2560 | 275       | 10        | 3      | 83                           | n/a                           | n/a                                     |
| 6                       | $\text{K}_2\text{Q}_{31}\text{K}_2^*$ | $^{13}\text{C}$ 1D                | 2048 | 275       | 10        | 3      | 83                           | n/a                           | n/a                                     |
| 6                       | $\text{K}_2\text{Q}_{30}\text{K}_2$   | $^{13}\text{C}$ 1D                | 2048 | 275       | 10        | 3      | 83                           | n/a                           | n/a                                     |
| 7                       | p2                                    | $^1\text{H}$ - $^{13}\text{C}$ CP | 512  | 275       | 12        | 3.5    | 83                           | n/a                           | n/a                                     |
| 7                       | p3                                    | $^1\text{H}$ - $^{13}\text{C}$ CP | 512  | 275       | 12        | 3.5    | 83                           | n/a                           | n/a                                     |
| 7                       | p2                                    | $^1\text{H}$ $t_2$ filter         | 4096 | 275       | 12        | 3.5    | 83                           | 1.0                           | 0                                       |
| 7                       | p3                                    | $^1\text{H}$ $t_2$ filter         | 4096 | 275       | 12        | 3.5    | 83                           | 1.0                           | 0                                       |
| 7                       | p2                                    | $^1\text{H}$ $t_2$ filter         | 4096 | 275       | 12        | 3.5    | 83                           | 1.0                           | 7                                       |
| 7                       | p3                                    | $^1\text{H}$ $t_2$ filter         | 4096 | 275       | 12        | 3.5    | 83                           | 1.0                           | 7                                       |
| S3, S4                  | p1                                    | $^1\text{H}$ - $^{13}\text{C}$ CP | 2048 | 267       | 16        | 4      | 83                           | n/a                           | n/a                                     |
| S3, S4                  | p2                                    | $^1\text{H}$ - $^{13}\text{C}$ CP | 8192 | 273       | 10        | 4      | 83                           | n/a                           | n/a                                     |
| S3, S4                  | p3                                    | $^1\text{H}$ - $^{13}\text{C}$ CP | 2048 | 275       | 13        | 3.5    | 83                           | n/a                           | n/a                                     |
| S4                      | p1                                    | $^{13}\text{C}$ 1D                | 2048 | 267       | 16        | 3      | 83                           | n/a                           | n/a                                     |
| S4                      | p2                                    | $^{13}\text{C}$ 1D                | 2048 | 273       | 10        | 3      | 83                           | n/a                           | n/a                                     |
| S4                      | p3                                    | $^{13}\text{C}$ 1D                | 4096 | 275       | 13        | 3.5    | 83                           | n/a                           | n/a                                     |
| 2D spectra <sup>a</sup> |                                       |                                   |      |           |           |        |                              |                               |                                         |
| Figure                  | Sample                                | Experiment                        | NS   | Temp. (K) | MAS (kHz) | RD (s) | TPPM during $t_1$ /ACQ (kHz) | $t_1$ evol. ( $\mu\text{s}$ ) | Mixing (ms)                             |
| 3a                      | p1                                    | DARR 2D                           | 64   | 267       | 16        | 3.5    | 83                           | 480x20.83                     | 25                                      |
| 3b, 4a                  | p2                                    | DARR 2D                           | 32   | 273       | 10        | 3.5    | 83                           | 550x22.07                     | 25                                      |
| 3c, 4b                  | p3                                    | DARR 2D                           | 96   | 275       | 13        | 3      | 83                           | 832x19.23                     | 25                                      |
| 4c                      | $\text{K}_2\text{Q}_{30}\text{K}_2$   | DARR 2D                           | 96   | 275       | 10        | 3      | 83                           | 550x22.07                     | 25                                      |
| 4d                      | p3                                    | SPC5 <sub>3</sub> 2D              | 1152 | 275       | 12        | 3      | 83                           | 64x100                        | 1.5                                     |
| S2                      | p4                                    | PDSO 2D                           | 64   | 275       | 12        | 3      | 83                           | 290x66.67                     | 400                                     |

a) Abbreviations used are: NS: number of scans per  $t_1$  point; RD: recycle delay; Temp.: temperature of cooling gas; TPPM:  $^1\text{H}$  decoupling during  $t_1$  evolution or acquisition periods.

b) Unlabeled samples are indicated with an asterisk (\*).

### References cited in the supporting information

- (1) Kricheldorf, H.; Müller, D. *Int. J. Biol. Macromol.* **1984**, *6*, 145-151.
- (2) Wishart, D. S.; Sykes, B. D. *J. Biomol. NMR* **1994**, *4*, 171-80.
- (3) Luca, S.; Filippov, D. V.; van Boom, J. H.; Oschkinat, H.; de Groot, H. J. M.; Baldus, M. *J. Biomol. NMR* **2001**, *20*, 325-31.
